# Supplementary material for: Computational design of quinone electrolytes for redox flow batteries using high-throughput machine learning and theoretical calculations
Source: Frontiers journal article supplement (doi:10.3389/fceng.2022.1086412), 2023-01-06
Supplement: Data_Sheet_3.docx [file Data_Sheet_3.docx]

Computational design of quinone electrolytes for redox flow batteries using machine learning and high-throughput theoretical calculations

Fei Wang,1 Jipeng Li,2 Zheng Liu,1 Tong Qiu1, Jianzhong Wu3, Diannan Lu*,1

1 Department of Chemical Engineering, Tsinghua University, Beijing, 100084

2 School of Materials Science and Engineering, Hainan University, Haikou 570228

3 Department of Chemical and Environmental Engineering and Department of Mathematics, University of California, Riverside, California 92521, United States

E-mail: [ludiannan@tsinghua.edu.cn](mailto:ludiannan@tsinghua.edu.cn);

This document provides computational details of the machine learning model building process, including the construction of a virtual quinone-like molecular library, quantitative computational results of molecular properties, hyperparameter selection for the Xgboost model, and model prediction results of molecular properties.

***Calculation of solvation free energy***

Solvation-free energy is the most fundamental property of molecules which can represent the actual solubility of the molecule to some extent. It refers to the energy change of the entire system during the process of dissolving solute molecules from vacuum to solvent at a fixed temperature and pressure. The method for calculating the solvation free energy by a combination of quantum mechanical (QM) calculations and classical density functional theory (cDFT) has been established in our previous work1–3. Specifically, the SPC/E4 water model is used for calculation, and the solute structure is determined using the Hartree−Fock (HF) method by energy minimization in a vacuum. The AM1-BCC5 atomic charges are assigned to calculate electrostatic interactions and the GAFF6 force-field parameters are chosen to describe the van der Waals (VDW) interactions.

***Calculation of HOMO-LUMO gap***

HOMO-LUMO gap refers to the energy difference between HOMO and LUMO in molecular orbital theory, which can be used to measure whether a molecule is easily excited. Thus HOMO-LUMO gap is used to characterize the open-circuit voltage when the substance molecule is used as the active material of the flow battery. All QM calculations are based on the ORCA ab initio quantum chemistry package7.

***Machine learning based on Xgboost***

To express the molecular structure as digital parameters that can be used by the machine learning model and unify the input features, we used RDKit (version 2017.09.1) python package to calculate 200 two-dimensional molecular descriptors for each molecule, which were used as input features of machine learning model. Xgboost8 (version 1.4.1) is a machine learning algorithm that has been optimized in algorithm and engineering based on the Gradient Boosting Decision Tree (GBDT). By continuously generating new decision trees to fit the residuals of the last prediction, Xgboost’s practicality has been verified in many tasks9–11.

***Machine learning based on Attentive FP***

Attentive Fingerprints (FP)12 is a representation method of a molecular graph network based on an attention mechanism. Unlike machine learning methods such as Xgboost, it represents the entire molecule as a graph. The atoms in the molecule are the nodes of the graph, and the bonds between the atoms are the undirected edges between the nodes. Through the calculation of the surrounding environment of each node atom in the molecular graph (the number and type of neighboring atoms, etc.), the characteristics of each node are obtained, and finally, the characteristics of a molecule as a whole are integrated, which is used to train the deep learning model based on the PyTorch to predict the molecule’s various properties. Both the calculation of molecular descriptors and molecular graph networks are carried out based on the SMILES expression of molecules.

***Hyperparameter optimization***

In this work, we use the Tree Parzen Estimator algorithm in Hyperopt13 to optimize the learning rate, dropout rate, the number of trees, and other parameters in the model. The detailed hyperparameters for optimization are listed in Supplementary Table S1.

Figure 1. Construction of virtual molecular libraries based on quinone backbone and specified substituents

Table S1. Hyperparameters for optimization in xgboost model

| hyperparameters | option |
| --- | --- |
| max_depth | [3,4,5,6,7,8,9] |
| min_child_weight | [1,2,3,4,5] |
| gamma | [0,0.02,0.04,0.06,0.08,0.10,0.12,0.14,0.16,0.18] |
| reg_lambda | [1e-5, 1e-2, 0.1, 1] |
| reg_alpha | [1e-5, 1e-2, 0.1, 1] |
| lr | [0.01, 0.05, 0.001, 0.005] |
| n_estimators | [80,90,100,110,120,130,140,150,160,170,180,190] |
| colsample_bytree | [0.75,0.80,0.85] |
| subsample | [0.75,0.80,0.85] |

Table S2. Quantitative computation of molecular properties and corresponding machine learning predictions.

| MOL | SMILES | QM_HOMO-LUMO | QM_ SFE | xgb_pred_hl | xgb_pred_sfe |
| --- | --- | --- | --- | --- | --- |
| 110AQ_0_0 | O=C(C1=C2)C=CC=C1C(C3=C2C=CC=C3)=O | 6.032 | -9.872 | 6.104 | -9.823 |
| 110AQ_1_1 | O=C(C1=C2)C(N(C)C)=CC=C1C(C3=C2C=CC=C3)=O | 5.919 | -11.582 | 6.056 | -11.542 |
| 110AQ_1_10 | O=C(C1=C2)C(C=C)=CC=C1C(C3=C2C=CC=C3)=O | 6.093 | -9.495 | 6.079 | -9.970 |
| 110AQ_1_11 | O=C(C1=C2)C(C=O)=CC=C1C(C3=C2C=CC=C3)=O | 6.333 | -12.424 | 6.189 | -12.743 |
| 110AQ_1_12 | O=C(C1=C2)C(C(=O)OC)=CC=C1C(C3=C2C=CC=C3)=O | 6.351 | -15.322 | 6.264 | -15.182 |
| 110AQ_1_13 | O=C(C1=C2)C(C(F)(F)F)=CC=C1C(C3=C2C=CC=C3)=O | 6.37 | -10.073 | 6.197 | -9.887 |
| 110AQ_1_14 | O=C(C1=C2)C(C#N)=CC=C1C(C3=C2C=CC=C3)=O | 6.393 | -14.039 | 6.295 | -13.787 |
| 110AQ_1_15 | O=C(C1=C2)C(C(O)O)=CC=C1C(C3=C2C=CC=C3)=O | 6.474 | -13.262 | 6.215 | -13.600 |
| 110AQ_1_16 | O=C(C1=C2)C(OP(O)O)=CC=C1C(C3=C2C=CC=C3)=O | 6.491 | -15.323 | 6.290 | -15.115 |
| 110AQ_1_17 | O=C(C1=C2)C(OS(=O)O)=CC=C1C(C3=C2C=CC=C3)=O | 6.493 | -14.496 | 6.152 | -14.812 |
| 110AQ_1_18 | O=C(C1=C2)C(ON=O)=CC=C1C(C3=C2C=CC=C3)=O | 6.344 | -11.566 | 6.319 | -11.790 |
| 110AQ_1_2 | O=C(C1=C2)C(N)=CC=C1C(C3=C2C=CC=C3)=O | 6.213 | -12.550 | 6.190 | -12.647 |
| 110AQ_1_3 | O=C(C1=C2)C(OC)=CC=C1C(C3=C2C=CC=C3)=O | 6.589 | -9.660 | 6.345 | -11.095 |
| 110AQ_1_4 | O=C(C1=C2)C(O)=CC=C1C(C3=C2C=CC=C3)=O | 6.77 | -13.998 | 6.366 | -13.003 |

The complete data sheet is available in SupplementaryInformation2.csv.

Table S3. Property prediction and scoring results for over 100,000 di-substitutes.

| BACKBONE | SMILE | SFE | HOMOLUMO | SCORE |
| --- | --- | --- | --- | --- |
| 110AQ | O=C(C1=C2)C(N(C)C)=C(N(C)C)C=C1C(C3=C2C=CC=C3)=O | -12.3143 | 6.0952 | 0.5100 |
| 110AQ | O=C(C1=C2)C=CC=C1C(C3=C2C=CC(C(F)(F)F)=C3C(O)O)=O | -15.6248 | 5.9994 | 0.5604 |
| 110AQ | O=C(C1=C2)C=CC=C1C(C3=C2C=CC(C(F)(F)F)=C3C#N)=O | -14.1183 | 6.1167 | 0.5411 |
| 110AQ | O=C(C1=C2)C=CC=C1C(C3=C2C=CC(C(F)(F)F)=C3C(F)(F)F)=O | -10.2264 | 6.0350 | 0.4722 |
| 110AQ | O=C(C1=C2)C=CC=C1C(C3=C2C=CC(C(F)(F)F)=C3C(=O)OC)=O | -15.1062 | 5.9546 | 0.5495 |
| 110AQ | O=C(C1=C2)C=CC=C1C(C3=C2C=CC(C(F)(F)F)=C3C=O)=O | -13.0904 | 6.1536 | 0.5259 |
| 110AQ | O=C(C1=C2)C=CC=C1C(C3=C2C=CC(C(F)(F)F)=C3C=C)=O | -9.9387 | 6.5173 | 0.4915 |
| 110AQ | O=C(C1=C2)C=CC=C1C(C3=C2C=CC(C(F)(F)F)=C3Cl)=O | -10.4859 | 6.1174 | 0.4806 |
| 110AQ | O=C(C1=C2)C=CC=C1C(C3=C2C=CC(C(F)(F)F)=C3F)=O | -10.0245 | 5.9093 | 0.4625 |
| 110AQ | O=C(C1=C2)C=CC=C1C(C3=C2C=CC(C(F)(F)F)=C3C)=O | -10.4369 | 6.1113 | 0.4795 |
| 110AQ | O=C(C1=C2)C=CC=C1C(C3=C2C=CC(C(F)(F)F)=C3S)=O | -10.9431 | 5.9661 | 0.4807 |
| 110AQ | O=C(C1=C2)C=CC=C1C(C3=C2C=CC(C(F)(F)F)=C3O)=O | -13.4111 | 5.9863 | 0.5228 |
| 110AQ | O=C(C1=C2)C=CC=C1C(C3=C2C=CC(C(F)(F)F)=C3OC)=O | -11.2956 | 6.2864 | 0.5026 |
| 110AQ | O=C(C1=C2)C=CC=C1C(C3=C2C=CC(C(F)(F)F)=C3N)=O | -13.6752 | 6.0951 | 0.5327 |

The complete data sheet is available in SupplementaryInformation3.csv.

Tabel S4. Achieved quinone-based redox flow battery performance.

| **Negative electrolyte** | **Positive electrolyte** | **Temperature** | **Membrane** | **Open Circuit voltage/V** | **Energy density/(Wh/L)** | **PH** | **Capacity fade rate** | **Solubility** |
| --- | --- | --- | --- | --- | --- | --- | --- | --- |
| AQDS | HBr | 40 | Nafion 212 | 0.86 | 16 | 0 | 0.1%–0.2%/day |  |
| 26DBEAQ | K4Fe(CN)6 | 20 |  | 1.05 | 17 | 12 | <0.01%/day | 0.6 M at pH 12 |
| 26DHAQ | K4Fe(CN)6 | 20 | Nafion 212 | 1.2 | 6.8 | 14 | 0.1%/cycle | >0.6 M in 1 M KOH |
| PEGAQ | K4Fe(CN)6 | 45 |  | 1 | 25.2 | 7 | 0.5%/day |  |

**Reference**

(1) Li, J.; Wang, J.; Wang, Y.; Lu, D.; Wu, J. A Multiscale Procedure for Predicting the Hydration Free Energies of Polycyclic Aromatic Hydrocarbons. *Journal of Chemical & Engineering Data* **2020**, *65* (4), 2206–2211.

(2) Liu, Y.; Zhao, S.; Wu, J. A Site Density Functional Theory for Water: Application to Solvation of Amino Acid Side Chains. *Journal of chemical theory and computation* **2013**, *9* (4), 1896–1908.

(3) Liu, Y.; Fu, J.; Wu, J. High-Throughput Prediction of the Hydration Free Energies of Small Molecules from a Classical Density Functional Theory. *The Journal of Physical Chemistry Letters* **2013**, *4* (21), 3687–3691.

(4) Berendsen, H.; Grigera, J.; Straatsma, T. The Missing Term in Effective Pair Potentials. *Journal of Physical Chemistry* **1987**, *91* (24), 6269–6271.

(5) Jakalian, A.; Jack, D. B.; Bayly, C. I. Fast, Efficient Generation of High‐quality Atomic Charges. AM1‐BCC Model: II. Parameterization and Validation. *Journal of computational chemistry* **2002**, *23* (16), 1623–1641.

(6) Wang, J.; Wolf, R. M.; Caldwell, J. W.; Kollman, P. A.; Case, D. A. Development and Testing of a General Amber Force Field. *Journal of computational chemistry* **2004**, *25* (9), 1157–1174.

(7) Neese, F. The ORCA Program System. *Wiley Interdisciplinary Reviews: Computational Molecular Science* **2012**, *2* (1), 73–78.

(8) Chen, T.; He, T.; Benesty, M.; Khotilovich, V.; Tang, Y.; Cho, H.; Chen, K. Xgboost: Extreme Gradient Boosting. *R package version 0.4-2* **2015**, *1* (4), 1–4.

(9) Pan, B. Application of XGBoost Algorithm in Hourly PM2. 5 Concentration Prediction; IOP publishing, 2018; Vol. 113, p 012127.

(10) Pesantez-Narvaez, J.; Guillen, M.; Alcañiz, M. Predicting Motor Insurance Claims Using Telematics Data—XGBoost versus Logistic Regression. *Risks* **2019**, *7* (2), 70.

(11) Zhang, X.; Yan, C.; Gao, C.; Malin, B. A.; Chen, Y. Predicting Missing Values in Medical Data via XGBoost Regression. *Journal of healthcare informatics research* **2020**, *4* (4), 383–394.

(12) Xiong, Z.; Wang, D.; Liu, X.; Zhong, F.; Wan, X.; Li, X.; Li, Z.; Luo, X.; Chen, K.; Jiang, H. Pushing the Boundaries of Molecular Representation for Drug Discovery with the Graph Attention Mechanism. *Journal of medicinal chemistry* **2019**, *63* (16), 8749–8760.

(13) Bergstra, J.; Yamins, D.; Cox, D. Making a Science of Model Search: Hyperparameter Optimization in Hundreds of Dimensions for Vision Architectures; PMLR, 2013; pp 115–123.
